# Supplementary material for: Histone H3K4 methylation regulates deactivation of the spindle assembly checkpoint through direct binding of Mad2
Source: PubMed Central journal article supplement — Genes Dev. 2016 May 15;30(10):1187–97. doi: 10.1101/gad.278887.116 (PMC4888839; doi:10.1101/gad.278887.116), 2016-05-15
Supplement: supp_gad.278887.116_Supplemental_Data.pdf [file supp_gad.278887.116_Supplemental_Data.pdf]

## SUPPLEMENTAL FIGURE LEGENDS

### Figure S1: Loss of *SET1* Does Not Create Cell Cycle Abnormalities, Related to

#### Figure 1.

(A) Serial five fold dilution assay of wild-type (WT) and mutants with the indicated genotype grown on either control plates (YPD) or plates containing the indicated amounts of benomyl. Cells were incubated at 30<sup>0</sup>C for 2 days. (B) Whole cell extracts were prepared from strains with the indicated genotype. The amount of H3K4 dimethylation ( $\alpha$ H3K4me<sub>2</sub>) and H3K4 trimethylation ( $\alpha$ H3K4me<sub>3</sub>) was assessed using immunoblot analysis. Total H3 ( $\alpha$ H3) protein levels were used as a loading control. (C) Cell cycle analysis was assessed in both wild-type (blue) and *set1* $\Delta$  (red) asynchronous cultures. Cells were subjected to DNA labeling, flow cytometry analysis, and corresponding histograms were generated. Peaks associated with cells in G1 and G2 are labeled accordingly. (D) The budding index of wild-type (WT) and *set1* $\Delta$  cells were assessed by dividing fixed cells into three categories; cells with no bud, cells with a small bud, and cells with a large bud. These categories correspond to G1, S, and G2/M, respectively. (E) Overnight cultures were diluted into fresh media and cell growth was assessed by Optic Density (O.D) over time in both wild-type (WT) and *set1* cells. (F) Equal amounts of wild-type (WT) and *set1* $\Delta$  cell cultures were taken from growth assays at the indicated time points and assessed for cell viability by counting colony forming units on normal YPD plates. (G) Yeast strains were fixed and Differential Interface Contrast (DIC) images were taken to assess overall cell shape, size, and morphology.

**Figure S2: H3K4 Mutants Do Not Alter Set1 Protein Levels or Incorporation Into the COMPASS Complex, Related to Figure 3.**

(A and B) Serial five fold dilution assay of wild-type (WT) and mutant yeast with the indicated genotypes. Cells were placed onto YPD plates (YPD) with or without 30 $\mu$ g/mL of benomyl (BENOMYL) and incubated at 30 $^{\circ}$ C for 2 days. (C) Whole cell extracts were isolated from strains with the indicated genotype. The amount of total Set1 protein was assessed using western blot analysis with an antibody against Set1. Pgk1 protein levels were used as a loading control. (D) Set1 proteins in wild-type (WT), *set1G951S*, and *H3K4R* strains similarly associate with the COMPASS component Bre2.

Immunoprecipitation (IP) assays were used to pull down Bre2 and the associated levels of Set1 were assessed. Bre2-TAP ( $\alpha$ -Protein A) and Pgk1 ( $\alpha$ -Pgk1) were used as loading controls. (E) Immunofluorescence images of wild-type (WT) and mutant yeast with the indicated genotype. Images of mitotic cells were taken on a confocal microscope. Tubulin (green) and DAPI (blue) were used to identify cells undergoing mitosis from an asynchronous culture. Mitotic cells are outlined in white. (F) RT-PCR was performed with isolated RNA from the indicated strains with primers specific to the gene indicated. RNA levels were compared to the *ACT1* gene transcript, which was used as a control. (G) Heat maps of H3K4me2 and H3K4me3 enrichment at the centromeric and pericentromeric regions of the indicated chromosomes.

**Figure S3: Two Histone H3 regions result in benomyl resistance when mutated, Related to Figure 5.**

(A) Serial five fold dilution assay of histone H3 mutant yeast with the indicated genotypes. Benomyl resistance is observed both for mutants that disrupt methylation at

K4 (*H3R2A* (Kirmizis et al. 2007) and *H3K4A*) and mutations that disrupt a consensus Mad2 binding motif (amino acids 23-30; marked with a black bar). (B) C-terminal epitope tags in Mad2 suppress the benomyl resistance of *set1* mutants, indicating disruption of the Mad2 C-terminus affects *in vivo* function of Mad2. Cells were grown onto YPD plates (YPD) with or without 30µg/mL of benomyl (BENOMYL) and incubated at 30°C for 2 days.

**Figure S4: GST-Mad2 localizes to the nucleus, cytoplasm, and the bud neck.**

(A) Expression of GST-Mad2 was induced in wild-type, *set1G951S*, and *H3K4R* cells by addition of galactose 30 minutes prior to harvest and Mad2 localization was analyzed with immunofluorescence. DAPI staining (blue) was used to visualize DNA and an α-GST antibody was used to monitor expression of the GST-Mad2 fusion protein. (B) Mad2 localization was assessed in wild-type, *set1G951S*, and *H3K4R* mutants by counting the percentage of GST-Mad2 positive cells with staining localized to the bud neck.

Kirmizis A, Santos-Rosa H, Penkett CJ, Singer MA, Vermeulen M, Mann M, Bahler J, Green RD, Kouzarides T. 2007. Arginine methylation at histone H3R2 controls deposition of H3K4 trimethylation. *Nature* **449**: 928-932.

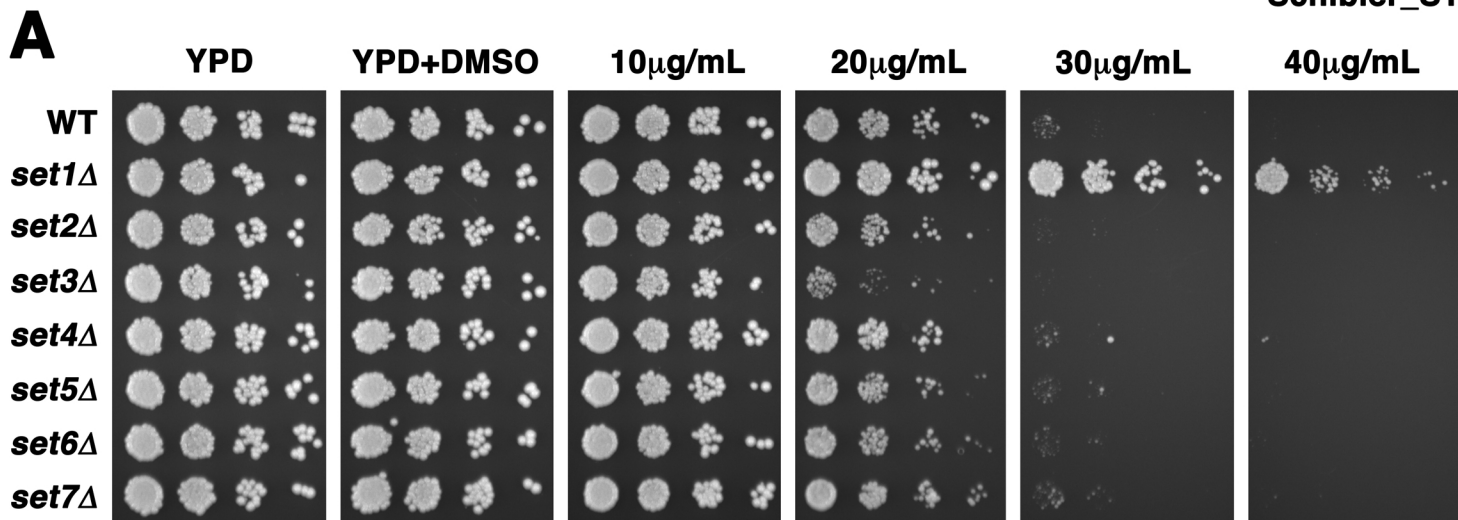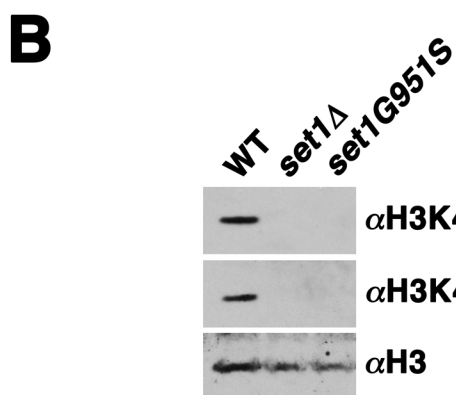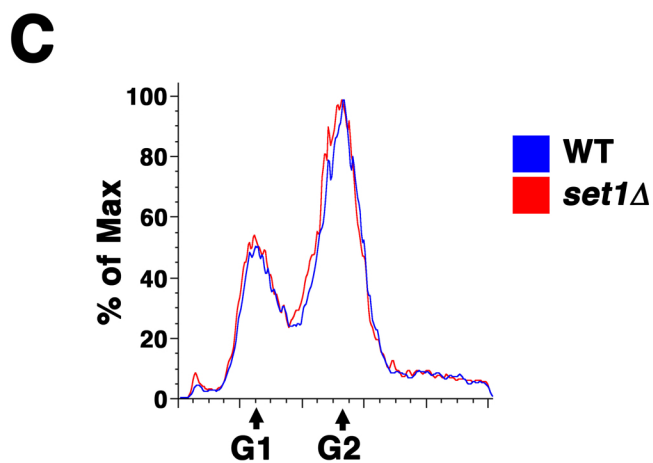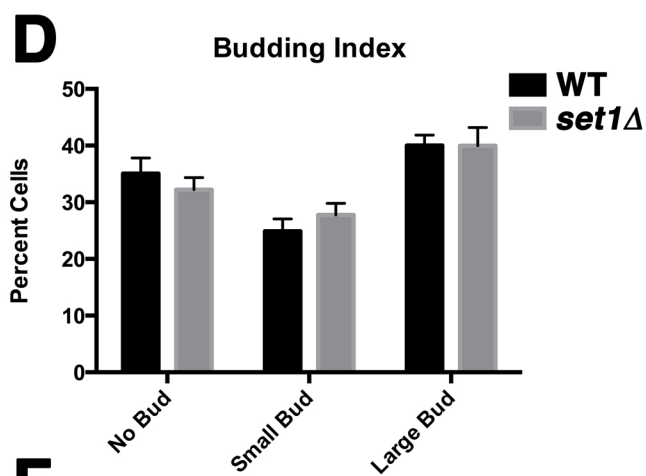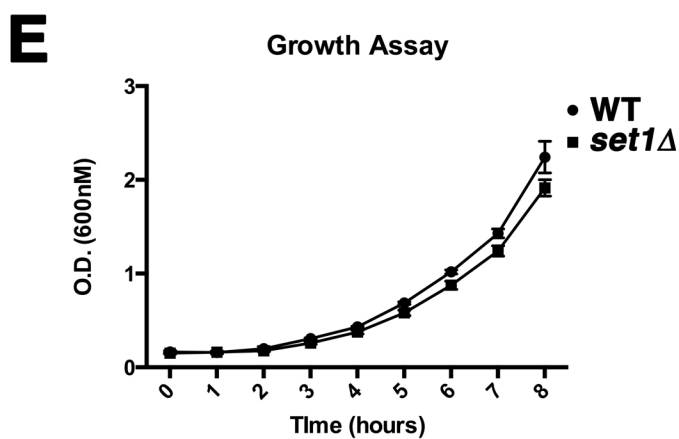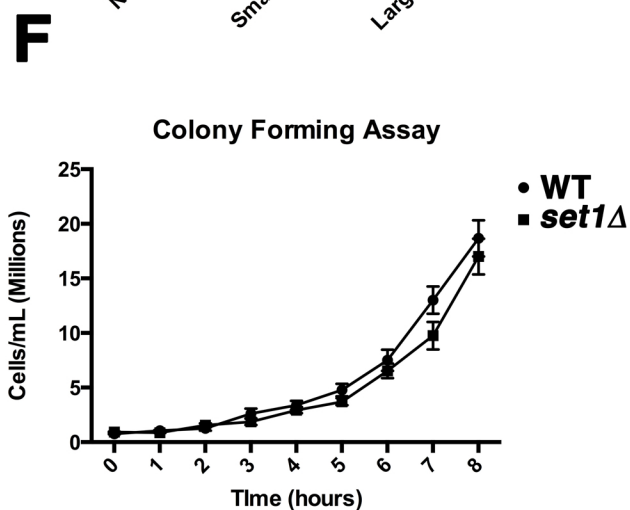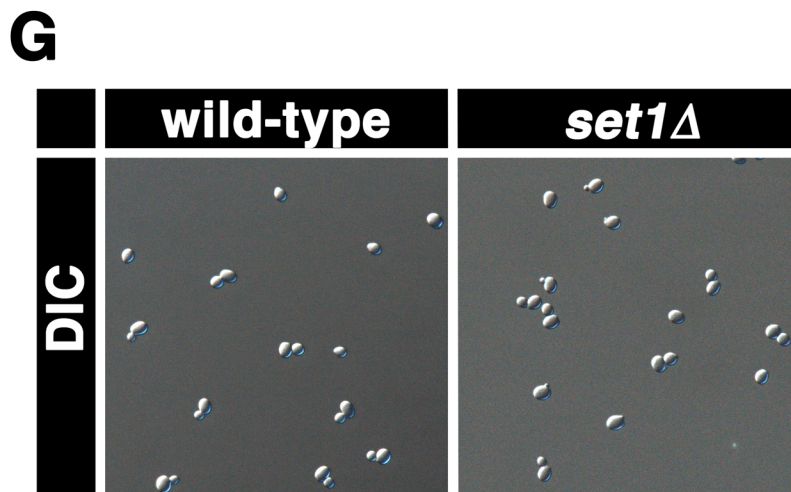

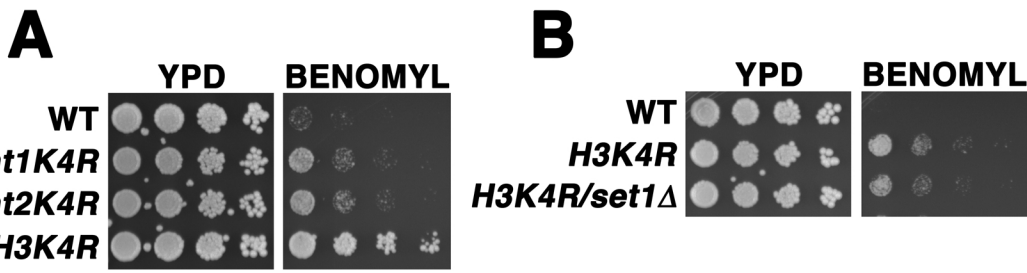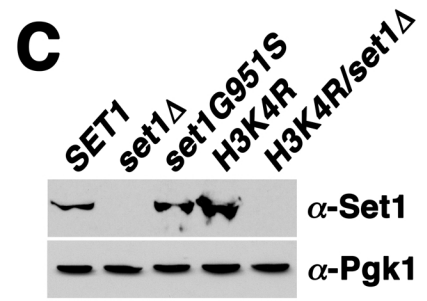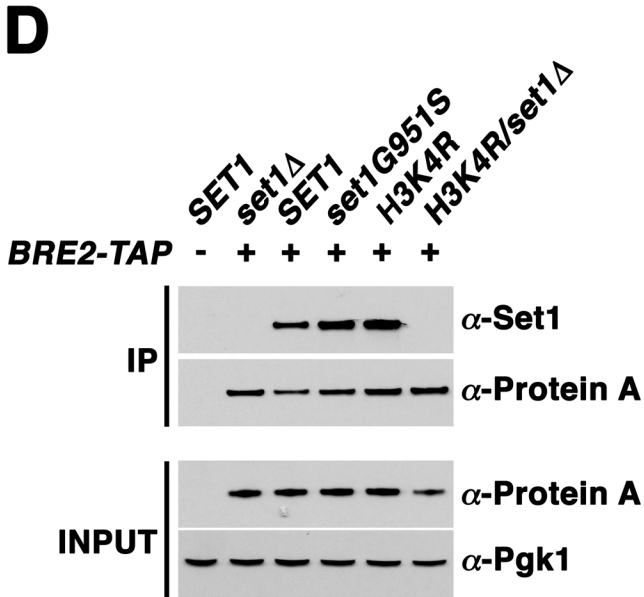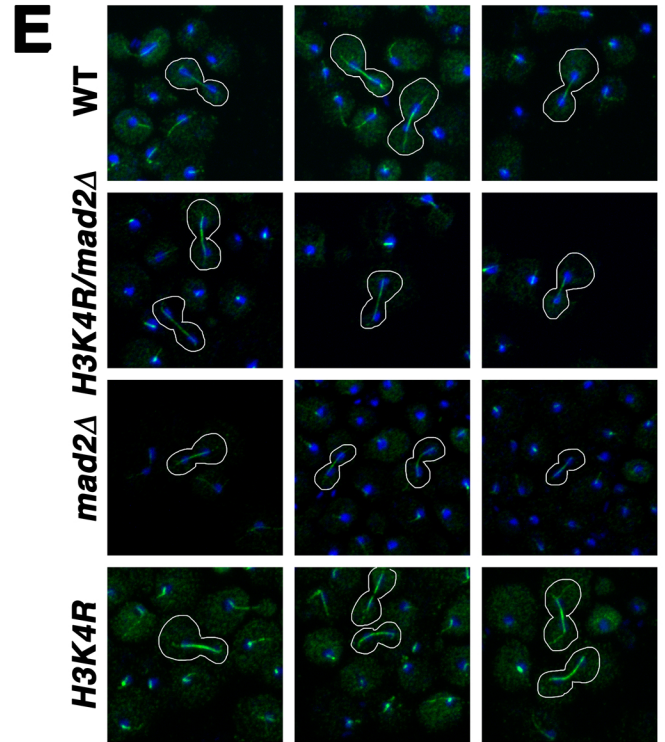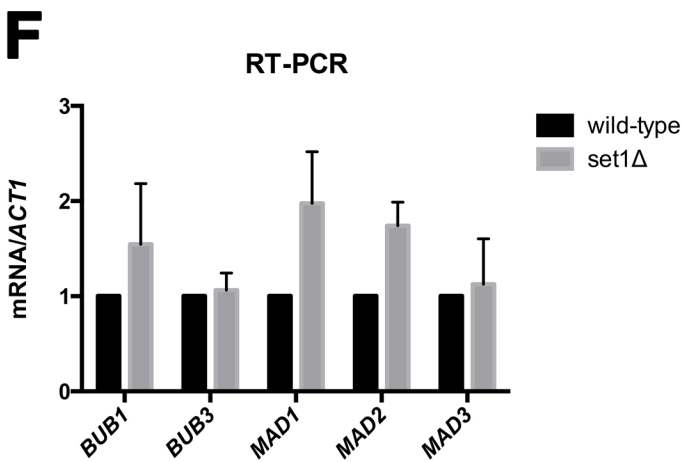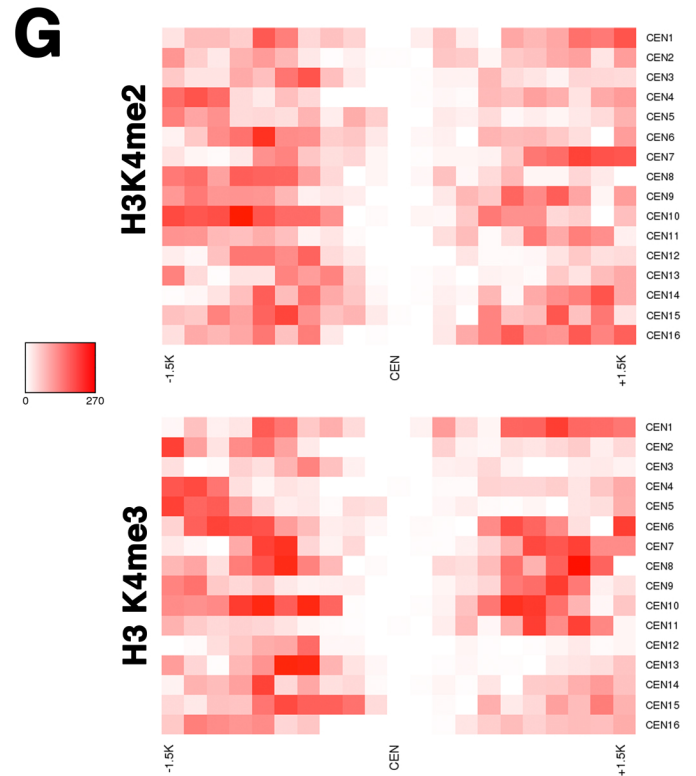

Schibler\_S3

BENOMYL

YPD

**B**

WT

*set1* $\Delta$ *mad2* $\Delta$ **MAD2-GFP****MAD2-GFP/*set1* $\Delta$** 

WT

*set1* $\Delta$ *mad2* $\Delta$ **MAD2-TAP****MAD2-TAP/*set1* $\Delta$** 

YPD

BENOMYL

**A****H3A1S****H3R2A****H3T3A****H3K4A****H3Q5A****H3T6A****H3Q19A****H3L20A****H3A21S****H3S22A****H3K23A****H3A24S****H3A25S****H3R26A****H3K27A****H3S28A****H3A29S****H3P30A**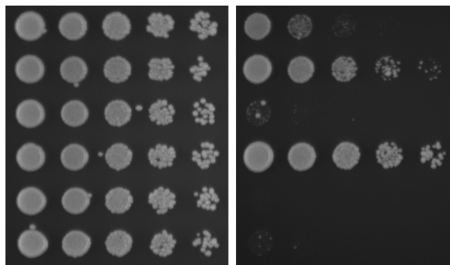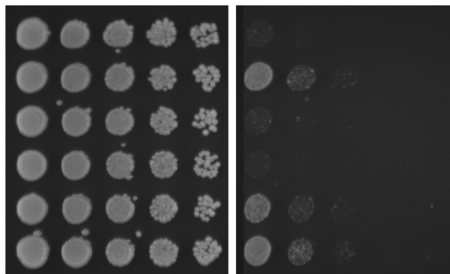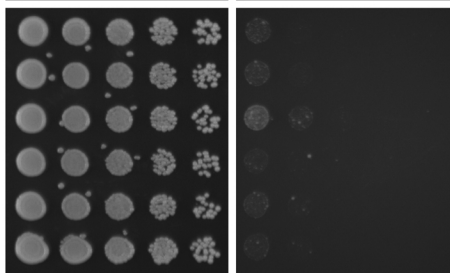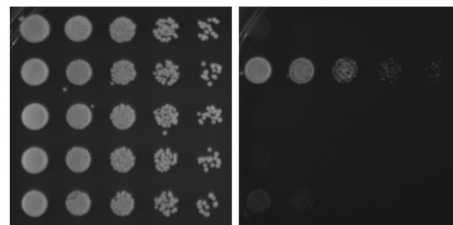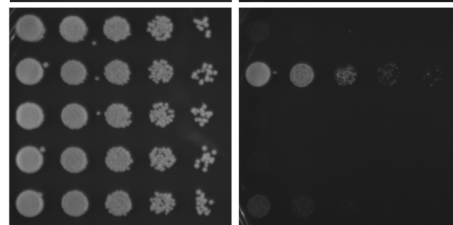

**A**

Schibler\_S4

Wild-type

*set1G951S**H3K4R*

pGAL-GST-Mad2

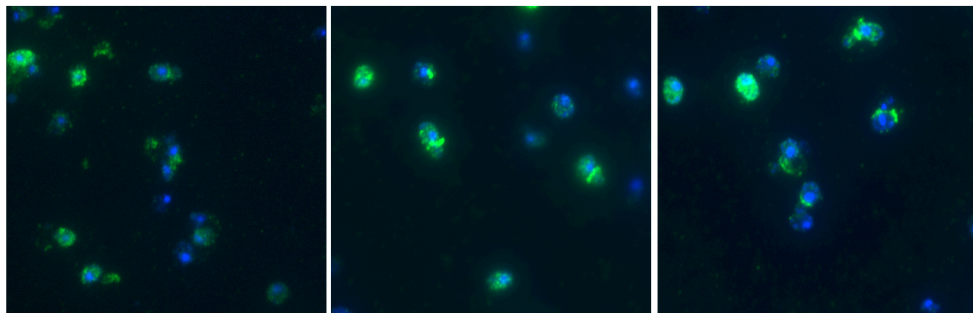**B**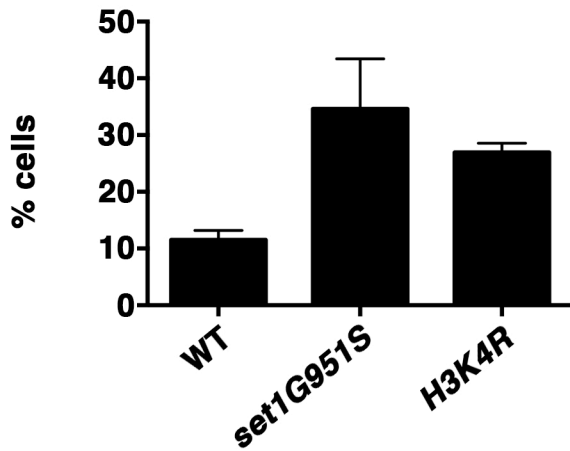

Table S1: Yeast Strains Used in this Study

| Strain | Genotype                                                                            | Source     |
|--------|-------------------------------------------------------------------------------------|------------|
| yAS1   | <i>MATa his3Δ1 leu2Δ0 met15Δ0 ura3Δ0</i>                                            | EUROSCARF  |
| yAS14  | <i>MATa his3Δ1 leu2Δ0 met15Δ0 ura3Δ0 set1Δ::KANMX</i>                               | This Study |
| yAS15  | <i>MATa his3Δ1 leu2Δ0 met15Δ0 ura3Δ0 set2Δ::kan<sup>r</sup></i>                     | This Study |
| yAS21  | <i>MATa his3Δ1 leu2Δ0 met15Δ0 ura3Δ0 set3Δ::kan<sup>r</sup></i>                     | This Study |
| yAS17  | <i>MATa his3Δ1 leu2Δ0 met15Δ0 ura3Δ0 set4Δ::kan<sup>r</sup></i>                     | This Study |
| yAS25  | <i>MATa his3Δ1 leu2Δ0 met15Δ0 ura3Δ0 set5Δ::kan<sup>r</sup></i>                     | This Study |
| yAS26  | <i>MATa his3Δ1 leu2Δ0 met15Δ0 ura3Δ0 set6Δ::kan<sup>r</sup></i>                     | This Study |
| yAS19  | <i>MATa his3Δ1 leu2Δ0 met15Δ0 ura3Δ0 set7Δ::kan<sup>r</sup></i>                     | This Study |
| yAS203 | <i>MATa his3Δ1 leu2Δ0 met15Δ0 ura3Δ0 bre1Δ::kan<sup>r</sup></i>                     | This Study |
| yAS28  | <i>MATa his3Δ1 leu2Δ0 met15Δ0 ura3Δ0 set1G951S</i>                                  | This Study |
| yAS225 | <i>MATa his3Δ1 leu2Δ0 met15Δ0 ura3Δ0 bre2-TAP::HIS</i>                              | This Study |
| yAS226 | <i>MATa his3Δ1 leu2Δ0 met15Δ0 ura3Δ0 bre2-TAP::HIS set1Δ::KANMX</i>                 | This Study |
| yAS227 | <i>MATa his3Δ1 leu2Δ0 met15Δ0 ura3Δ0 bre2-TAP::HIS set1G951S</i>                    | This Study |
| yAS93  | <i>MATa his3Δ1 leu2Δ0 met15Δ0 ura3Δ0 swd1Δ::kan<sup>r</sup></i>                     | This Study |
| yAS75  | <i>MATa his3Δ1 leu2Δ0 met15Δ0 ura3Δ0 swd3Δ::kan<sup>r</sup></i>                     | This Study |
| yAS90  | <i>MATa his3Δ1 leu2Δ0 met15Δ0 ura3Δ0 sdc1Δ::kan<sup>r</sup></i>                     | This Study |
| yAS10  | <i>MATa his3Δ1 leu2Δ0 met15Δ0 ura3Δ0 bre2Δ::kan<sup>r</sup></i>                     | This Study |
| yAS12  | <i>MATa his3Δ1 leu2Δ0 met15Δ0 ura3Δ0 spp1Δ::kan<sup>r</sup></i>                     | This Study |
| yAS92  | <i>MATa his3Δ1 leu2Δ0 met15Δ0 ura3Δ0 shg1Δ::kan<sup>r</sup></i>                     | This Study |
| yAS42  | <i>MATa his3Δ1 leu2Δ0 met15Δ0 ura3Δ0 bub1Δ::kan<sup>r</sup></i>                     | This Study |
| yAS44  | <i>MATa his3Δ1 leu2Δ0 met15Δ0 ura3Δ0 bub3Δ::kan<sup>r</sup></i>                     | This Study |
| yAS30  | <i>MATa his3Δ1 leu2Δ0 met15Δ0 ura3Δ0 set1G951S bub1Δ::kan<sup>r</sup></i>           | This Study |
| yAS32  | <i>MATa his3Δ1 leu2Δ0 met15Δ0 ura3Δ0 set1G951S bub3Δ::kan<sup>r</sup></i>           | This Study |
| yAS45  | <i>MATa his3Δ1 leu2Δ0 met15Δ0 ura3Δ0 mad1Δ::kan<sup>r</sup></i>                     | This Study |
| yAS46  | <i>MATa his3Δ1 leu2Δ0 met15Δ0 ura3Δ0 mad2Δ::kan<sup>r</sup></i>                     | This Study |
| yAS47  | <i>MATa his3Δ1 leu2Δ0 met15Δ0 ura3Δ0 mad3Δ::kan<sup>r</sup></i>                     | This Study |
| yAS33  | <i>MATa his3Δ1 leu2Δ0 met15Δ0 ura3Δ0 set1G951S mad1Δ::kan<sup>r</sup></i>           | This Study |
| yAS34  | <i>MATa his3Δ1 leu2Δ0 met15Δ0 ura3Δ0 set1G951S mad2Δ::kan<sup>r</sup></i>           | This Study |
| yAS35  | <i>MATa his3Δ1 leu2Δ0 met15Δ0 ura3Δ0 set1G951S mad3Δ::kan<sup>r</sup></i>           | This Study |
| yAS129 | <i>MATa his3Δ1 leu2Δ0 met15Δ0 ura3Δ0 dam1K233R</i>                                  | This Study |
| yAS153 | <i>MATa his3Δ1 leu2Δ0 met15Δ0 ura3Δ0 hht1K4R hht2K4R</i>                            | This Study |
| yAS36  | <i>MATa his3Δ1 leu2Δ0 met15Δ0 ura3Δ0 hht1K4R hht2K4R bub1Δ::kan<sup>r</sup></i>     | This Study |
| yAS38  | <i>MATa his3Δ1 leu2Δ0 met15Δ0 ura3Δ0 hht1K4R hht2K4R bub3Δ::kan<sup>r</sup></i>     | This Study |
| yAS39  | <i>MATa his3Δ1 leu2Δ0 met15Δ0 ura3Δ0 hht1K4R hht2K4R mad1Δ::kan<sup>r</sup></i>     | This Study |
| yAS40  | <i>MATa his3Δ1 leu2Δ0 met15Δ0 ura3Δ0 hht1K4R hht2K4R mad2Δ::kan<sup>r</sup></i>     | This Study |
| yAS41  | <i>MATa his3Δ1 leu2Δ0 met15Δ0 ura3Δ0 hht1K4R hht2K4R mad3Δ::kan<sup>r</sup></i>     | This Study |
| yAS229 | <i>MATa his3Δ1 leu2Δ0 met15Δ0 ura3Δ0 bre2-TAP::HIS hht1K4R hht2K4R</i>              | This Study |
| yAS228 | <i>MATa his3Δ1 leu2Δ0 met15Δ0 ura3Δ0 bre2-TAP::HIS hht1K4R hht2K4R set1Δ::KANMX</i> | This Study |
| yAS232 | <i>MATa his3Δ1 leu2Δ0 met15Δ0 ura3Δ0 cdc20-127</i>                                  | This Study |
| yAS233 | <i>MATa his3Δ1 leu2Δ0 met15Δ0 ura3Δ0 cdc20-127 set1G951S</i>                        | This Study |
| yAS237 | <i>MATa his3Δ1 leu2Δ0 met15Δ0 ura3Δ0 cdc20-127 hht1K4R hht2K4R</i>                  | This Study |
| yAS234 | <i>MATa his3Δ1 leu2Δ0 met15Δ0 ura3Δ0 PDS1-18MYC</i>                                 | This Study |
| yAS235 | <i>MATa his3Δ1 leu2Δ0 met15Δ0 ura3Δ0 PDS1-18MYC set1G951S</i>                       | This Study |
| yAS147 | <i>MATa his3Δ1 leu2Δ0 met15Δ0 ura3Δ0 MAD2-GFP::HIS set1Δ::KANMX</i>                 | This Study |
| yAS162 | <i>MATa his3Δ1 leu2Δ0 met15Δ0 ura3Δ0 MAD2-GFP::HIS</i>                              | This Study |
| yAS187 | <i>MATa his3Δ1 leu2Δ0 met15Δ0 ura3Δ0 pGAL-GST-MAD2::URA3</i>                        | This Study |
| yAS188 | <i>MATa his3Δ1 leu2Δ0 met15Δ0 ura3Δ0 pGAL-GST-MAD2::URA3 set1G951S</i>              | This Study |
| yAS189 | <i>MATa his3Δ1 leu2Δ0 met15Δ0 ura3Δ0 pGAL-GST-MAD2::URA3 hht1K4R hht2K4R</i>        | This Study |
| yAS230 | <i>MATa his3Δ1 leu2Δ0 met15Δ0 ura3Δ0 MAD2-TAP::HIS</i>                              | This Study |
| yAS231 | <i>MATa his3Δ1 leu2Δ0 met15Δ0 ura3Δ0 MAD2-TAP::HIS set1Δ::KANMX</i>                 | This Study |



Table S2: Plasmids Used in this Study

| <b>Construct</b> | <b>Content</b>        | <b>Content (Amino Acids) Mutations</b> | <b>Source:</b>     |
|------------------|-----------------------|----------------------------------------|--------------------|
| <b>pGEX4T1</b>   | GST                   | GST                                    | GE Healthcare      |
| <b>pAS48</b>     | GST-yMad2-full length | GST-yMad2 (1-197)                      | This study         |
| <b>pAS119</b>    | GST-yMad2-Open        | GST-yMad2 (1-191)                      | This study         |
| <b>pAS120</b>    | GST-yMad2-RQEA        | GST-yMad2 (1-197) R126E/Q127A          | This study         |
| <b>pAS43</b>     | GST-hMad2             | GST-hMad2 (1-206)                      | Dr. Toshiyuki Habu |
| <b>pAS133</b>    | GST-hMad2-RQEA        | GST-hMad2 (1-206) R133E/Q134A          | This study         |
| <b>pAS134</b>    | GST-hMad2-Open        | GST-hMad2 (1-196)                      | This study         |
| <b>pAS56</b>     | H3.1-6xHIS            | H3.1-6xHIS                             | This study         |
| <b>pAS146</b>    | H3.1(K23A)-6xHIS      | H3.1(K23A)-6xHIS                       | This study         |
| <b>pAS148</b>    | H3.1(R26A/K27A)-6xHIS | H3.1(R26A/K27A)-6xHIS                  | This study         |
